# Supplementary material for: How does the entropy of ternary polymer–solvent–cosolvent mixtures depend on the molar solvent fraction?
Source: Royal Society of Chemistry journal article supplement (doi:10.1039/c6ra23340f), 2016-01-01
Supplement: c6ra23340f1.pdf [file c6ra23340f1.pdf]

Electronic supplementary information to the manuscript entitled “How does the entropy of ternary polymer-solvent-cosolvent mixtures depend on the molar solvent fraction?”

Evangelos Voyiatzis<sup>a,b</sup> and Michael C. Böhm<sup>a</sup>

<sup>a</sup> Eduard-Zintl-Institut für Anorganische und Physikalische Chemie and Center of Smart Interfaces, Technische Universität Darmstadt, Alarich-Weiss-Strasse 4, 64287 Darmstadt, Germany.

<sup>b</sup> Faculty of Physics, University of Vienna, Boltzmannngasse 5, 1090 Vienna, Austria.

All quantities in the present work are reported in Lennard-Jones units. The Lennard-Jones potential,  $V$ , is given by the expression  $V(\bar{r}) = 4\epsilon[(\sigma/\bar{r})^{12} - (\sigma/\bar{r})^6]$  where  $\bar{r}$  is the distance between two interacting particles,  $\epsilon$  is the depth of the potential and  $\sigma$  the finite distance at which the potential energy is equal to zero. The Lennard-Jones units can be derived by scaling the quantities of interest with an appropriate combination of the  $\epsilon$  and  $\sigma$  parameters of the Lennard-Jones potential as well as the mass of a particle, which is denoted as  $m$ . A set of scalings for the most important quantities in the current study is presented in Table S.1, where  $k_B$  is the Boltzmann constant. A bar over a quantity denotes its unscaled value.

Table S.1: Lennard-Jones scalings of important quantities discussed in the present work

| Quantity       | Symbol       | Scaling                                   |
|----------------|--------------|-------------------------------------------|
| Length         | $\bar{r}$    | $r = \bar{r}/\sigma$                      |
| Energy         | $\bar{E}$    | $E = \bar{E}/\epsilon$                    |
| Time           | $\bar{t}$    | $\tau = \bar{t}\sqrt{\epsilon/m\sigma^2}$ |
| Temperature    | $\bar{T}$    | $T = k_B\bar{T}/\epsilon$                 |
| Number density | $\bar{\rho}$ | $\rho = \bar{\rho}\sigma^3$               |

The system is studied under periodic boundary conditions in all three Cartesian coordinates. The simulation box is cubic and its axes have a length of approximately  $24.565 \sigma$ . The reduced number density,  $\rho$ , is equal to 0.85. All particles have the same mass. Bonded polymer particles interact via a finitely extensible nonlinear elastic potential

$$V_b(l) = -33.75 \ln[1 - (l/1.5)^2]$$

where  $l$  is the bond length. The dispersion interactions are described by shifted and truncated Lennard-Jones potentials. The explicit form of this potential is

$$V_{LJ}(r) = \begin{cases} 4[(r^{-12} - r^{-6}) - (r_c^{-12} - r_c^{-6})], & r \leq r_c \\ 0, & r > r_c \end{cases}$$

where  $r_c$  is the cut-off distance. In the present study, the  $\epsilon$  parameter is equal to unity for all interactions. A complete listing of the employed  $\sigma$  and  $r_c$  values of all pairs for particle types is given in Table S.2. Additionally, the variation of the pair potential energy as a function of the distance between two particles is shown in Fig. S.1.

Table S.2: Lennard-Jones parameters for the dispersion interactions

| Pair                | $\sigma$ | $r_c$      |
|---------------------|----------|------------|
| Polymer-Polymer     | 1.0      | $2^{1/6}$  |
| Solvent-Solvent     | 0.5      | $2^{-5/6}$ |
| Cosolvent-Cosolvent | 0.5      | $2^{-5/6}$ |
| Polymer-Solvent     | 0.5      | $2^{-5/6}$ |
| Polymer-Cosolvent   | 0.75     | 2.5        |
| Solvent-Cosolvent   | 0.5      | $2^{-5/6}$ |

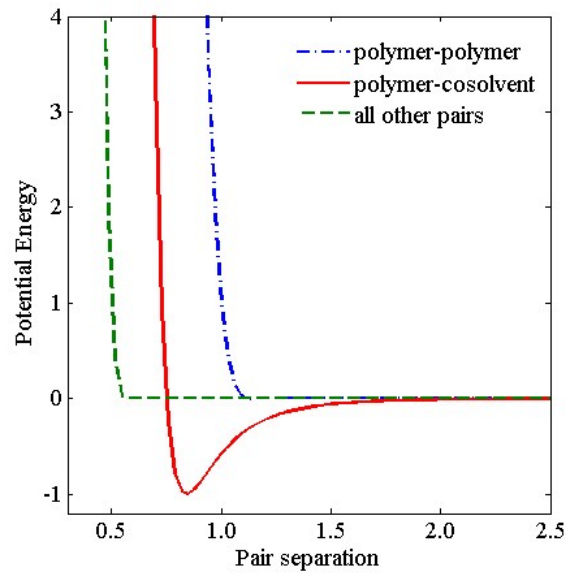

Figure S.1: Potential energy profiles employed in the present work

The molecular dynamics simulations are performed in the canonical statistical ensemble. The starting configurations were generated by creating a self-avoiding random walk chain in the center of the simulation box. The solvent and cosolvent beads were placed in a lattice around the chain to guarantee that they fill the space uniformly. The equations of motion are integrated using the velocity-Verlet algorithm with a timestep of  $0.005 \tau$ . The temperature is controlled by the Nosé - Hoover thermostat. All systems are equilibrated for  $5 \cdot 10^5 \tau$ . Configurations are sampled every  $10^3 \tau$ .
